1 **Endosymbiotic adaptations in three new bacterial species associated with *Dictyostelium***  
2 ***discoideum*: *Burkholderia agricolaris* sp. nov., *Burkholderia hayleyella* sp. nov., and**  
3 ***Burkholderia bonniea* sp. nov.**

4 **Debra A. Brock<sup>1\*</sup>, Alicia N.M. Hubert<sup>1</sup>, Suegene Noh<sup>2</sup>, Susanne DiSalvo<sup>3</sup>, Katherine S.**  
5 **Geist<sup>1</sup>, Tamara Haselkorn<sup>4</sup>, David C. Queller<sup>1</sup>, Joan E. Strassmann<sup>1</sup>**

6 <sup>1</sup>Department of Biology, Washington University in St. Louis, Saint Louis, MO USA

7 <sup>2</sup>Biology Department, Colby College, Waterville, ME USA

8 <sup>3</sup>Department of Biology, Southern Illinois University Edwardsville, Edwardsville, IL USA

9 <sup>4</sup>Department of Biology, University of Central Arkansas, Conway, AK USA

10

11

12

13 **\* Correspondence:**

14 Debra A. Brock

15 dbrock@wustl.edu

16 **Running title: New bacterial social amoeba symbionts**

17 **Keywords: symbiosis, mutualism, social amoebae, *Burkholderia*, *Dictyostelium***

18

19

20 **Abstract (103/250 words)**

21 Here we name three species of *Burkholderia* that can defeat the mechanisms by which bacteria  
22 are normally excluded from the spores of a soil dwelling eukaryote *Dictyostelium discoideum*,  
23 which is predatory on bacteria. They are *B. agricolaris* sp. nov., *B. hayleyella* sp. nov., and *B.*  
24 *bonniea* sp. nov. These new species are widespread across the eastern USA and were isolated as  
25 internal symbionts of wild collected *D. discoideum*. Evidence that they are each a distinct new  
26 species comes from their phylogenetic position, carbon usage, reduced cell length, cooler  
27 optimal growth temperature, and ability to invade *D. discoideum* amoebae and remain there for  
28 generations.

29 **Importance (97/150 words)**

30 The evolutionary origins of symbioses are best investigated in systems that retain flexibility in  
31 association. In these interactions, the tensions between host and symbiont will be more dynamic  
32 and conflicts more easily assessed. One recently developed example is the symbiosis between  
33 the social amoeba *Dictyostelium discoideum* and the three new species of *Burkholderia* presented  
34 here. All three of these new species facilitate the prolonged carriage of food bacteria by  
35 *Dictyostelium discoideum*. Further studies of the interactions of these three new species with *D.*  
36 *discoideum* should be very fruitful for understanding the ecology and evolution of mutualistic  
37 symbioses.

38

39 **Introduction**

40 We are only beginning to appreciate that every feature of eukaryotes has evolved in a microbial  
41 world (1). Eukaryote soil-dwelling amoebae are particularly exposed to bacteria in their  
42 environment. They may be penetrated by bacteria using secretion systems (2). They may ingest  
43 bacteria that foil their digestive systems and take up residence inside their cells (3). Some  
44 bacteria may become permanent or semi-permanent residents (4). In this study, we examine the  
45 characteristics of *Burkholderia* that have formed symbiotic relationships with the social amoeba  
46 *Dictyostelium discoideum* (4). Based on data presented here and data previously published, we  
47 name three new species in the plant beneficial clade of *Burkholderia*.

48

49 The genus *Burkholderia* is comprised of over 60 species that were originally included in the  
50 genus *Pseudomonas*, but was identified as unique by Yabuuchi et al. in 1992 (5). *Burkholderia*  
51 are diverse and include species that are adapted for life in the soil, as endosymbionts, and as  
52 pathogens for both plants and animals. Of the pathogenic bacteria, there is a group of 18 species  
53 that are together identified as the *Burkholderia cepacia* complex (BCC), which are most  
54 predominantly associated with infections that can be lethal in immunocompromised human  
55 patients, most notably, patients with cystic fibrosis (6). Because of the wide variety of species  
56 Sawana et al. (7) proposed separating the genus into two separate genera: *Burkholderia*, which  
57 contains the pathogenic species and *Paraburkholderia* which contains the environmental species.  
58 However, further examination of this clade reveals that this separation and reclassification is  
59 premature because of difficulties in placing intermediate species (8). Therefore, we stick with  
60 the original genus name, *Burkholderia*.

61

62 To support naming new species, we examined multiple isolates of each species in several ways.  
63 First, we have already established that they can cause the farming trait in *D. discoideum*, where  
64 farming is the ability to carry food bacteria through the social stage and then release and  
65 consume it after the spores hatch (4). Second, we place the *Burkholderia* isolates in a phylogeny  
66 along with other *Burkholderia* species. Third, we examine carbon usage using a suite of possible  
67 carbon food sources. Fourth, we measure the length of the bacterial cells. Fifth, we investigate  
68 optimal growing temperatures. Based on these data, we name 3 new species.

69

## 70 **Results**

71 *B. agricolaris* sp. nov., *B. hayleyella* sp. nov., and *B. bonniea* sp. nov. are gram -negative,  
72 motile, rod-shaped,  $\beta$ -proteobacteria. We isolated these bacteria in association with field-  
73 collected clones of *D. discoideum* (Table 1). These symbiotic species can be differentiated from  
74 each other and from other *Burkholderia* by their endosymbiotic habit (4), phylogenetic  
75 placement, carbon usage profile, cell length, and optimal temperature range.

76

77 **Phylogenetic analysis.** The phylogeny that we constructed from whole genome k-mers of 23  
78 bases is very robust, with every node obtaining 100% bootstrap support (Figure 1). There is  
79 some structure within *B. agricolaris*. Its closest relative is *B. fungorum* strain BAA-463 from the  
80 American Tissue Culture Collection. The other two new species, *B. hayleyella*, and *B. bonniea*,  
81 are each other's closest relatives and their long-branch lengths indicate they are quite diverged

82 from anything else in this phylogeny. The sister taxon to *B. hayleyella* and *B. bonniea* is the  
83 entire clade containing *B. agricolaris*.

84

85 **Carbon usage for *B. hayleyella* and *B. bonniea* is greatly reduced.** The 95 carbon types from  
86 Biolog GN2 test plates are organized into eleven functional groups (Supplementary Table 2), and  
87 we subjected these groups to principal component analysis (PCA). The generalized output of the  
88 PCA revealed that most of the variation could be described by PC1 (79.3%) and PC2 (8.6%).  
89 PC1 is composed of ten of the eleven components and positively correlates roughly equally with  
90 nine of these components (carbohydrates, esters, carboxylic acids, amides, amino acids, aromatic  
91 chemicals, amines, alcohols, and phosphorylated chemicals) suggesting these nine criteria vary  
92 together, with a tendency towards loss in *B. hayleyella* and *B. bonniea*. PC2 is composed of six  
93 components and positively correlates strongly with two (phosphorylated chemicals and amines).  
94 One component of the PCA analysis, brominated chemicals, was utilized by all of the bacteria so  
95 was not useful in distinguishing between the carbon groups. The scatter plot of the component  
96 scores for PC1 and PC2 shows that the non-symbiotic species and *B. agricolaris* sp. nov. can use  
97 a broader range of carbon sources than *B. hayleyella* or *B. bonniea* (Figure 2). We found the  
98 most variance in carbon use was explained by an interaction between *Burkholderia* species and  
99 carbon type ( $\chi^2 = 497.43$ , DF = 43,  $P \ll 0.001$ ,  $\Delta\text{AIC} = -175.0$ ). We also found an overall effect  
100 of both additive terms in the model, *Burkholderia* clade ( $\chi^2 = 58.54$ , DF = 3,  $P \ll 0.001$ ,  $\Delta\text{AIC} =$   
101  $-52.5$ ) and carbon type ( $\chi^2 = 383.94$ , DF = 10,  $P \ll 0.001$ ,  $\Delta\text{AIC} = -363.9$ ), over the null model.  
102 From our model, we found *B. agricolaris*, *B. hayleyella*, and *B. bonniea* are all significantly  
103 different from one another (Benjamini-Hochberg adjusted p-values: *B. agricolaris*/*B. hayleyella*

104  $P \ll 0.001$ , *B. agricolaris*/*B. bonniea*  $P \ll 0.001$ , *B. hayleyella*/*B. bonniea*  $P = 0.003$ ). Specific  
105 differences can be found in the species descriptions.

106

107 We also found *B. hayleyella* and *B. bonniea* are significantly different in overall carbon usage  
108 compared to the three closely related non-symbiont species while *B. agricolaris* are not  
109 (Benjamini-Hochberg adjusted p-values: *B. agricolaris*  $p = 0.34$ , *B. hayleyella*  $P \ll 0.001$ , *B.*  
110 *bonniea*  $P \ll 0.001$ ). However, though carbon usage of *B. agricolaris* is not statistically  
111 different from the non-symbiont species, Table 1 and Supplementary Table 6 highlight  
112 differences in usage of specific carbons by *B. agricolaris* sp. nov. These include no utilization of  
113 D-melibiose by *B. agricolaris* sp.nov. compared to close sister non-symbiont *B. fungorum*, and  
114 no utilization of adonitol by *B. agricolaris* sp.nov. compared to close sister non-symbiont *B.*  
115 *xenovorans*. Additionally, many or all of *B. agricolaris* sp.nov. are able to utilize several carbon  
116 sources that *B. fungorum* ATCC\_BAA-463 cannot. Examples are: 100% *B. agricolaris* sp.nov.  
117 tested can utilize hydroxy-L-proline, 86% tested can utilize L-ornithine and inosine, and 71%  
118 tested can utilize glycogen, D-cellobiose, and  $\alpha$ -D-lactone.

119

120 We also found differences in the overall pattern of carbon use when we performed pairwise  
121 comparisons between species for each of the individual carbon source types (Supplementary  
122 Table 3). From these pairwise carbon use comparisons, some patterns emerge. The divergence  
123 in carbon use for *B. hayleyella* and *B. bonniea* from the non-symbiont species and *B. agricolaris*  
124 is predominantly in their use of amino acids, carbohydrates, and carboxylic acids. However, *B.*  
125 *hayleyella* and *B. bonniea* diverge from each other in their use of amides and carbohydrates. *B.*

126 *agricolaris* and *B. hayleyella* also diverge in their use of amides. *B. agricolaris* has maintained a  
127 similar carbon use pattern to the outgroup species, but it seems to be beginning to diverge in its  
128 use of aromatic chemicals, specifically inosine.

129

130 **Symbiont bacteria length is shorter.** We examined morphological differences between the new  
131 *Burkholderia* species and non-symbiont controls by measuring bacterial length (Figure 3). The  
132 generalized linear mixed model showed an overall difference in the effect of *Burkholderia* clade  
133 on length ( $\chi^2 = 17.19$ , DF = 3,  $P < 0.001$ ,  $\Delta\text{AIC} = -11$ ). Between species, we found that all  
134 *Burkholderia* sp. nov. are significantly shorter in length than the outgroup species (Benjamini-  
135 Hochberg adjusted  $P$ -values: *B. agricolaris*  $P = 0.0013$ , *B. hayleyella*  $P \ll 0.001$ , *B. bonniea*  $P =$   
136  $0.0012$ ). We also found that lengths differed between *B. agricolaris* and *B. hayleyella* ( $P =$   
137  $0.033$ ), but not between *B. agricolaris* and *B. bonniea* ( $P = 0.32$ ) or between *B. hayleyella* and *B.*  
138 *bonniea* ( $P = 0.67$ ).

139

140 **Optimal growth temperature for symbiont *Burkholderia* sp. nov. is reduced compared to**  
141 **close relative non-symbiont *Burkholderia*.** We tested all isolates to determine the range of  
142 temperatures permissive for growth and the optimal growth temperature. We used a range of five  
143 temperatures: 4°C, 22°C, 30°C, 37°C, and 45°C. For range of growth, we first found that none of  
144 our isolates including the non-symbiont controls were able to sustain visible growth at either 4°C  
145 or 45°C (Figure 4). The optimal growth temperature for the three symbiont *Burkholderia* sp.  
146 nov. is 30°C compared to the non-symbiont optimum of 37°C. We found all isolates of *B.*  
147 *hayleyella* and *B. bonniea* grew less densely overall and had no growth at 37°C compared to non-

148 symbiont controls and *B. agricolaris*. *B. agricolaris* grew vigorously at 30°C and moderately  
149 well at 37°C compared to non-symbiont controls that had excellent growth at a higher optimal  
150 temperature of 37°C. We performed a Fisher's Exact Test comparing the 22°C, 30°C, and 37°C  
151 data and excluding the 4°C and 45°C because neither symbiont nor non-symbiont isolates grew at  
152 these two temperatures. The results of the exact contingency table test (Supplementary Table 5)  
153 showed that the growth range and extent of growth differed among the four groups of  
154 *Burkholderia* ( $P < 0.001$ ). We did post hoc tests to determine specific growth differences.  
155 Using a Bonferroni corrected cutoff of 0.008, *B. hayleyella* is significantly different from *B.*  
156 *agricolaris* ( $P = 0.000022$ ) and the non-symbionts ( $P = 0.0032$ ). *B. bonniea* is different from *B.*  
157 *agricolaris* ( $P = 0.0072$ ), but not the non-symbionts ( $P = 0.063$ ), or from *B. hayleyella* ( $P =$   
158  $0.074$ ). Lastly, *B. agricolaris* does not differ from the non-symbionts ( $P = 0.091$ ).

159

160 **Description of *Burkholderia agricolaris* sp. nov., *Burkholderia hayleyella* sp. nov., and**  
161 ***Burkholderia bonniea* sp. nov.**

162 *Burkholderia agricolaris* (uh'gri.ko.la.ris L. fem. adj. *agricolaris* facilitating farming). The  
163 morphology of colonies is off-white, domed, and shiny with smooth edges. Bacteria are motile,  
164 non-sporulating, straight rods. The G+C content varies between 61.5 and 61.9 mol% calculated  
165 from whole genomic sequences. The strains are stored in a sterile 20% glycerol solution at  
166 -80°C and subcultured on SM/5 agar plates at 22°C. We isolated the type strain BaQS159 as a  
167 symbiont of wild *D. discoideum* clone QS159 in May 2008. *D. discoideum* QS159 was isolated  
168 from soil and leaf litter collected from Mountain Lake Biological Station in April 2008. The  
169 G+C content of the type strain is 61.6 mol% calculated from the whole genomic sequence.



170 Good growth at 30°C, weak growth at 22°C and 37°C, and no growth at either 4°C or 45°C on  
171 nutrient agar containing glucose, bactopectone, and yeast extract. The type strain BaQS159 has  
172 the ability to utilize the following carbon sources as determined by the Biolog GN2 test panel:  
173 Tween 40; Tween 80; N-Acetyl-D-galactosamine; N-Acetyl-D-glucosamine; Adonitol; L-  
174 Arabinose; D-Arabitol; D-Fructose; L-Fucose; D-Galactose;  $\alpha$ -D-Glucose; m-Inositol; D-  
175 Mannitol; D-Mannose; L-Rhamnose; D-Sorbitol; Methyl Pyruvate; Mono-Methyl-Succinate;  
176 Acetic Acid; Cis-Aconitic Acid; Citric Acid; Formic Acid; D-Galactonic Acid Lactone; D-  
177 Gluconic Acid; D-Glucosaminic Acid; D-Glucuronic Acid;  $\alpha$ -Hydroxy Butyric Acid;  $\beta$ -Hydroxy  
178 Butyric Acid; p-Hydroxy Phenylacetic Acid;  $\alpha$ -Keto Butyric Acid;  $\alpha$ -Keto Glutaric Acid; D,L-  
179 Lactic Acid; Malonic Acid; Propionic Acid; Quinic Acid; D-Saccharic Acid; Sebacic Acid;  
180 Succinic Acid; Bromo Succinic Acid; Succinamic Acid; L-Alaninamide; D-Alanine; L-Alanine;  
181 L-Alanyl-glycine; L-Asparagine; L-Aspartic Acid; L-Glutamic Acid; Glycyl-L-Glutamic Acid;  
182 L-Histidine; Hydroxy-L-Proline; L-Leucine; L-Ornithine; L-Phenylalanine; L-Proline; L-  
183 Pyroglutamic Acid; D-Serine; L-Serine; L-Threonine;  $\gamma$ -Amino Butyric Acid; Urocanic Acid;  
184 Inosine; Uridine; Glycerol. The majority of characteristics for the type strain are in agreement  
185 with other six tested representatives of *B. agricolaris* sp. nov. *Burkholderia hayleyella* sp.nov.  
186 are susceptible to tetracycline at 30 $\mu$ g/ml.

187

188 Differences between *Burkholderia* sp.nov.:

189 *B. agricolaris* BaQS159 is able to utilize N-Acetyl-D-galactosamine, N-Acetyl-D-glucosamine,  
190 Adonitol, L-Arabinose, D-Arabitol, D-Fructose, D-Galactose, m-Inositol, D-Mannitol, L-  
191 Rhamnose, D-Sorbitol, Mono-Methyl-Succinate, Cis-Aconitic Acid, Citric Acid, Formic Acid,

192 D-Galactonic Acid Lactone, D-Glucosaminic Acid, D-Glucuronic Acid, p-Hydroxy Phenylacetic  
193 Acid, Malonic Acid, Quinic Acid, D-Saccharic Acid, Sebacic Acid, Succinamic Acid, L-  
194 Alaninamide, L-Alanine, L-Histidine, Hydroxy-L-Proline, L-Leucine, L-Ornithine, L-  
195 Phenylalanine, L-Pyroglutamic Acid, D-Serine,  $\gamma$ -Amino Butyric Acid, Urocanic Acid, Inosine,  
196 Uridine, and Glycerol which *B. hayleyella* BhQS11 cannot.

197 *B. agricolaris* BaQS159 is able to utilize N-Acetyl-D-galactosamine, Adonitol, L-Arabinose, D-  
198 Arabitol, L-Fucose, D-Galactose, m-Inositol, D-Mannitol, L-Rhamnose, D-Sorbitol, Mono-  
199 Methyl-Succinate, Acetic Acid, Formic Acid, D-Galactonic Acid Lactone, D-Glucuronic Acid,  
200 p-Hydroxy Phenylacetic Acid, Malonic Acid, Quinic Acid, D-Saccharic Acid, Sebacic Acid, L-  
201 Histidine, Hydroxy-L-Proline, L-Ornithine, L-Phenylalanine, L-Pyroglutamic Acid, D-Serine,  $\gamma$ -  
202 Amino Butyric Acid, Urocanic Acid, Uridine, and Glycerol which *B. bonniea* BbQS859 cannot.

203

204 *Burkholderia hayleyella* (hey'lee.el.uh. N.L. fem. adj. *hayleyella*, pertaining to Hayley. This  
205 specific epithet is in honor of the daughter of Debra A. Brock). Colony morphology is off-white,  
206 domed, and shiny with smooth edges. Bacteria are motile, non-sporulating, straight rods. The  
207 strains are stored in a sterile 20% glycerol solution at  $-80^{\circ}\text{C}$  and subcultured on SM/5 agar  
208 plates at  $22^{\circ}\text{C}$ . We isolated the type strain BhQS11 as a symbiont of wild *D. discoideum* clone  
209 QS11 in February 2008. *D. discoideum* QS11 was isolated from soil and leaf litter collected  
210 from Mountain Lake Biological Station in October 2000. The G+C content is 59.24 mol%  
211 calculated from whole genomic sequence. Good growth at  $30^{\circ}\text{C}$ , weak growth at  $22^{\circ}\text{C}$ , and no  
212 growth at either  $4^{\circ}\text{C}$ ,  $37^{\circ}\text{C}$ , or  $45^{\circ}\text{C}$  on nutrient agar containing glucose, bactopectone, and yeast  
213 extract. The type strain BaQS11 has the ability to utilize the following carbon sources as

214 determined by the Biolog GN2 test panel: Tween 40; Tween 80; L-Fucose;  $\alpha$ -D-Glucose; D-  
215 Mannose; Methyl Pyruvate; Acetic Acid; D-Gluconic Acid;  $\alpha$ -Hydroxy Butyric Acid;  $\beta$ -Hydroxy  
216 Butyric Acid;  $\alpha$ -Keto Butyric Acid;  $\alpha$ -Keto Glutaric Acid; D,L-Lactic Acid; Propionic Acid;  
217 Succinic Acid; Bromo Succinic Acid; D-Alanine; L-Alanyl-glycine; L-Asparagine; L-Aspartic  
218 Acid; L-Glutamic Acid; Glycyl-L-Glutamic Acid; L-Proline; L-Serine; L-Threonine. The  
219 majority of characteristics for the type strain are in agreement with other six tested  
220 representatives of *B. hayleyella* sp. nov. *Burkholderia hayleyella* sp.nov. are susceptible to  
221 0.1  $\mu$ g/ml ampicillin plus 0.3  $\mu$ g/ml streptomycin sulphate, and to tetracycline at 30  $\mu$ g/ml.

222

223 Differences between *Burkholderia* sp.nov.: *B. hayleyella* BhQS11 is able to utilize L-Fucose  
224 and Acetic Acid which *B. bonniea* BbQS859 cannot. *B. hayleyella* BhQS11 utilizes a smaller  
225 subset of the same carbons as *B. agricolaris* BaQS159.

226

227 *Burkholderia bonniea* (baan'-ee-uh. N.L. fem. adj. *bonniea*, pertaining to Bonnie. This specific  
228 epithet is in honor of the mother of Susanne DiSalvo). Colonies are off-white, shiny, and domed  
229 with smooth edges. Bacteria are motile, non-sporulating, straight rods. The strains are stored in  
230 a sterile 20% glycerol solution at  $-80^{\circ}\text{C}$  and subcultured on SM/5 agar plates at  $22^{\circ}\text{C}$ . We  
231 isolated the type strain BbQS859 as a symbiont of wild *D. discoideum* clone QS859 in August  
232 2014. *D. discoideum* QS859 was isolated from deer feces collected from Mountain Lake  
233 Biological Station in July 2014. The G+C content of the type strain is 58.7 mol% calculated  
234 from whole genomic sequence. Good growth at  $30^{\circ}\text{C}$ , weak growth at  $22^{\circ}\text{C}$ , and no growth at  
235 either  $4^{\circ}\text{C}$ ,  $37^{\circ}\text{C}$ , or  $45^{\circ}\text{C}$  on nutrient agar containing glucose, bactopectone, and yeast extract.

236 The type strain BaQS859 has the ability to utilize the following carbon sources as determined by  
237 the Biolog GN2 test panel: Tween 40; Tween 80; N-Acetyl-D-glucosamine; D-Fructose;  $\alpha$ -D-  
238 Glucose; D-Mannose; Methyl Pyruvate; Mono-Acetic Acid; Cis-Aconitic Acid; Citric Acid; D-  
239 Gluconic Acid; D-Glucosaminic Acid;  $\alpha$ -Hydroxy Butyric Acid;  $\beta$ -Hydroxy Butyric Acid;  $\alpha$ -  
240 Keto Butyric Acid;  $\alpha$ -Keto Glutaric Acid; D,L-Lactic Acid; Propionic Acid; Succinic Acid;  
241 Bromo Succinic Acid; Succinamic Acid; L-Alaninamide; D-Alanine; L-Alanine; L-Alanyl-  
242 glycine; L-Asparagine; L-Aspartic Acid; L-Glutamic Acid; Glycyl-L-Glutamic Acid; L-Leucine;  
243 L-Proline; L-Serine; L-Threonine; Inosine.

244 Differences in carbon utilization between *Burkholderia* sp.nov.:

245 *B. bonniea* BbQS859 is able to utilize N-Acetyl-D-glucosamine, D-Fructose, Mono-Acetic  
246 Acid, Cis-Aconitic Acid, Citric Acid, Succinamic Acid, L-Alaninamide, L-Alanine, L-Leucine,  
247 and Inosine which *B. hayleyella* BhQS11 cannot. *B. bonniea* BbQS859 is able to utilize Mono-  
248 Acetic Acid which *B. agricolaris* BaQS159 cannot.

249

## 250 **Discussion**

251 We use several kinds of evidence to delineate *B. agricolaris*, *B. hayleyella*, and *B. bonniea* as  
252 new species. We have tested the closest 16S relatives and found only these three sp. nov. have  
253 the ability to colonize *D. discoideum*, to be carried through multiple amoebae to fruiting body  
254 cycles, and to facilitate the carriage of food bacteria to seed new environments (4). We place  
255 these new species in a phylogeny which shows they each comprise fully supported independent  
256 clades. Phylogenetic evidence also show *B. hayleyella*, and *B. bonniea* strongly diverged from

257 other *Burkholderia* species. We analyzed physical and phenotypic traits of carbon usage,  
258 bacterial length, and optimal growth temperature and found significant differences from non-  
259 symbiont *Burkholderia*. The three *Burkholderia* sp. nov. have also diverged from each other in  
260 pairwise carbon usage. Moreover, both *B. agricolaris* and *B. bonniea* are able to utilize some  
261 carbons that non-symbiont *Burkholderia* cannot. These data support the identification and  
262 naming of three new *Burkholderia* species.

263 Our three *Burkholderia* sp. nov. have a facultative endosymbiotic lifestyle with their host  
264 *Dictyostelium discoideum*. A common feature of endosymbiosis is the streamlining and loss of  
265 non-essential genes (9). Several lines of evidence suggest cell size corresponds positively with  
266 genome size. Examples are found in red blood cells and genome size of vertebrates where the  
267 red blood cell increases with genome size (10). Using avian genomes known to be small and  
268 streamlined compared to other vertebrates, Organ et al. found a similar pattern of correspondence  
269 between fossilized osteocytes and predicted genome size in extant vertebrates (11). Beaulieu et  
270 al. also found a similar pattern in a broad array of 101 angiosperms showing cell size and  
271 genome size scale positively, something that has proven generally true in plants (12) (13). Here,  
272 we demonstrate that the lengths of the symbiotic *Burkholderia* sp. nov. bacteria are smaller than  
273 their free-living closest relatives. Additionally, the type strains of *B. hayleyella*, *B. bonniea*, and  
274 *B. agricolaris* have lost the ability to utilize many of the 95 carbons tested compared to the non-  
275 symbiont *Burkholderia* tested suggesting corresponding gene losses based on loss of function.  
276 These data taken together suggest genome streamlining of non-essential genes for the three  
277 *Burkholderia* sp. nov. consistent with an endosymbiotic lifestyle.

278 Lastly, the optimal growth temperature of the three *Burkholderia* sp. nov. at 30°C is lower than  
279 the non-symbiont outgroup species at 37°C. One possible explanation could be that this is an

280 adaptation to the much lower optimal growth temperature range of their host *D. discoideum*  
281 which is 20-25°C (14)

282 In sum, these three new species have diverged from their ancestors in measurable ways that are  
283 likely to be due to their endosymbiotic habit within *D. discoideum*. We suggest classifying these  
284 isolates as novel species for which the names *Burkholderia agricolaris*, *Burkholderia hayleyella*,  
285 and *Burkholderia bonniea* are proposed with the type strains BaQS159 (Dictybase DBS0351125;  
286 NCTC xx), BhQS11 (Dictybase DBS0351126; NCTC xx), and BbQS859 (Dictybase  
287 DBS0351127; NCTC xx) respectively, as the type strains.

288

## 289 **Materials and Methods**

290 **Bacteria isolates:** Wild *Burkholderia* symbiont strains used in this study were isolated from the  
291 Queller and Strassmann (QS) *D. discoideum* collection. See Supplementary Table 1 for  
292 collection locations and GPS coordinates. We previously isolated *Burkholderia* strains BhQS11,  
293 BhQS21, BhQS22, BhQS23, BhQS155, BaQS159, and BaQS161 (15) and *Burkholderia* strains  
294 BaQS70, and BaQS175 (4). We then isolated *Burkholderia* strains BaQS31, BhQS46, BhQS69,  
295 BaQS80, BhQS115, BaQS317, BbQS433, BhQS530, BbQS859, BaQS983, BaQS1007, and  
296 BaQS1045. We used *Burkholderia fungorum* ATCC BAA-463, *Burkholderia xenovorans*  
297 LB400, and *Burkholderia phymatum* STM-815 for our non-symbiont, close relative reference  
298 strains. See Supplementary Table 1 for specific strains used in preparing the phylogeny and for  
299 examining carbon usage, cell length, and optimal growth temperatures. The strains are stored in  
300 a sterile 20% glycerol solution at -80°C and subcultured on SM/5 agar plates (2 g glucose, 2 g  
301 Oxoid bactopectone, 2 g Oxoid yeast extract, 0.2 g MgSO<sub>4</sub>, 1.9 g KH<sub>2</sub>PO<sub>4</sub>, 1 g K<sub>2</sub>HPO<sub>4</sub>, and

302 15.5 g agar per liter DDH<sub>2</sub>O) at 22°C. To propagate bacteria from frozen stocks for  
303 experimental assays, we plated on SM/5 nutrient agar plates and grew at 22°C to stationary  
304 phase.

305 **Phylogeny:** We used k-mers, DNA "words" of a given length k, to estimate the phylogenetic  
306 relationships of the symbionts relative to other known plant-associated and environmental  
307 *Burkholderia*. Such alignment- or even genome assembly-free methods are increasingly  
308 available for many types of analyses that leverage next-generation sequencing data, including  
309 phylogenetic reconstruction (16). These types of methods are particularly powerful because they  
310 can combine assembled and unassembled genome sequencing data since k-mer frequencies can  
311 be estimated from either data source. These methods also improve upon the shortfalls of species  
312 delineation using 16S (17) as they can take into account sequence characteristics of entire  
313 genomes.

314 We first estimated phylogenies using three different k-mer sizes, k=23, 29, and 31 with AAF  
315 (Assembly and Alignment-Free) version 20160831 (18). The number of potential k-mers  
316 increases by a factor of 4 as k-mer size increases. The appropriate size of k-mer to adopt is thus a  
317 balance between information content (larger k-mers contain more information) and  
318 computational efficiency (smaller k-mers require less computation and memory). Because all  
319 topologies were identical for the k-mer sizes we tested, we chose k=23 for our final k-mer size.  
320 Next, we ran 999 nonparametric bootstraps and resampled 1/k rows (k=23) from the shared k-  
321 mer table as described by the developer of this software (<https://github.com/fanhuan/AAF>  
322 accessed Dec 2017). These bootstraps indicated that our topology was robust (all bootstrap  
323 values = 1).

324 **Carbon Usage:** We used Biolog GN2 Microplates to determine carbon source usage patterns for  
325 each bacterial isolate (Biolog Inc., Hayward, CA). These plates contain 95 test carbons and one  
326 blank control well. The 95 test carbons correspond to 11 carbon groups such as carbohydrates  
327 and amino acids (see Supplementary Table 2 for complete list of carbon groups and individual  
328 carbons in each group). We brought the plates to room temperature prior to filling. We made  
329 suspensions in non-nutrient buffer for each bacterial isolate at OD<sub>600</sub> 0.7. We then added 150uL  
330 of this bacteria suspension to each well of the GN2 plate. Plates were incubated at 30°C for 24  
331 hours, at which point they were photographed and the optical density was measured using a  
332 Tecan Infinite M200Pro plate reader (Wavelength = 590nm, bandwidth = 9nm, 5 flashes per  
333 well). We scored the results from the Biolog tests binomially – either the well was positive,  
334 meaning that the bacteria could use the substance as a carbon source, or the well was negative  
335 and it was not an available carbon source. To determine if a well was positive or negative, we  
336 calculated if the absorbance of each well minus the blank control absorbance is above or below  
337 97.5% of the blank control. This is equivalent to a 5% confidence for a two-tailed distribution.  
338 We determined the negative baseline independently for each plate based on the value of the  
339 blank control. We analyzed all data using R v3.4.1 (19) employing the following specific  
340 packages (20-22). We performed a principal component analysis on the ability of individual  
341 members of each *Burkholderia* sp. nov. and the three close sister *Burkholderia* to utilize carbon  
342 grouped into 11 carbon types (See Supplementary Table 2 for individual carbons in each group).  
343 To test the effect of carbon usage by *Burkholderia* species, we used a generalized linear mixed  
344 model with a random-slope and a binomial error distribution. We used *Burkholderia* clone as  
345 our random factor, with clade and carbon type as fixed factors, and ability to use a particular  
346 carbon source as the response. We also compared each carbon source between species pairs



347 (Supplementary Table 3) with *post hoc* comparisons and Benjamini-Hochberg adjusted *P*-values  
348 (23).

349 **Bacterial Length:** To examine morphological characteristics, we grew each bacterial isolate  
350 from frozen stocks on SM/5 agar plates (24) for about 4 days to stationary phase. We then  
351 collected and prepared a bacterial suspension of each test isolate in non-nutrient buffer (2.25 g  
352  $\text{KH}_2\text{PO}_4$  and 0.67 g  $\text{K}_2\text{HPO}_4$  per liter  $\text{DDH}_2\text{O}$ ) at  $\text{OD}_{600}$  1.5. To prepare fixed bacteria for  
353 imaging by microscopy, we first prepared the fixative solution by adding 6.26  $\mu\text{L}$  of 8%  
354 glutaraldehyde per one mL of 16% paraformaldehyde (Electron Microscopy Sciences, Hatfield  
355 PA USA). Next, we added 200 $\mu\text{L}$  of each bacterial suspension, 8 $\mu\text{L}$  of 1M  $\text{NaPO}_4$  pH 7.4, and  
356 40 $\mu\text{L}$  of the fixative solution to a 1.5ml. Eppendorf tube and gently mixed. We incubated the  
357 reactions for 15 minutes at room temperature, followed immediately by 30 minutes on ice. We  
358 then centrifuged briefly at 10,000 g to pellet and wash the bacteria, repeating 3 times using  
359 phosphate buffered saline (PBS; Fisher Scientific, Pittsburg PA, USA), and ultimately  
360 resuspending in 1ml PBS. We prepared the microscope slides for image capture by adding  
361 200 $\mu\text{L}$  of 1% agarose in PBS (melted and slightly cooled) onto a single-depression microscope  
362 slide (VWR, Radnor PA, USA) and immediately overlaid with a cover slip. After 10 minutes of  
363 cooling, we removed the cover slip and added 5 $\mu\text{L}$  of the fixed bacteria samples directly onto the  
364 agarose pad. Once the bacteria solution dried, the coverslip was replaced. We captured images  
365 and measured the lengths of about 100 individual bacteria for each isolate using a Nikon TI-E  
366 microscope and NIS-Elements software (see Supplementary Table 4 for exact number measured  
367 for each isolate). Using R and package (21), we compared bacterial lengths among each isolate  
368 using a generalized linear mixed model with a random-slope and a negative binomial error  
369 distribution. We used *Burkholderia* clone as our random factor and clade as a fixed factor, with

370 cell length as the response. We made *post hoc* comparisons to test the effect of differences in  
371 bacterial length between species pairs using Benjamini-Hochberg adjusted *P*-values (23).

372 **Optimal growth temperature:** To determine the temperature for optimal growth for each  
373 species, we streaked all clones on SM/5 plates and placed them in 5 different temperatures (4°C,  
374 22°C, 30°C, 37°C, and 45°C). We examined the plates and photographed them at 24 hours. We  
375 scored plate growth using the following categories: no growth, little growth, moderate growth,  
376 and excellent growth. We recorded optimal growth temperature for each isolate based on the  
377 temperature at which the bacteria grew the most densely. We made a heat map of the data  
378 (Figure 4) and performed a Fisher's Exact Test with a 4 x 3 matrix testing the 22°C, 30°C, and  
379 37°C temperature data to look for correlations (22). We excluded 4°C and 45°C data from the  
380 analysis because none of the isolates including the controls grew at these temperatures.

381 **Data deposition:** All data are deposited in the Dryad Digital Repository (will deposit after  
382 acceptance).

383

#### 384 **Conflict of Interest**

385 The authors declare that the research was conducted in the absence of any commercial or  
386 financial relationships that could be construed as a potential conflict of interest.

387

#### 388 **Author Contributions**

389 DB, AH, SN, SD, TH, DQ, and JS conceived of the study. AH and DB performed the  
390 experimental assays. SN constructed the phylogeny. KG did and advised on much of the

391 statistical analyses. DB, AH, SN, KG, DQ, and JS wrote the final draft. All authors reviewed  
392 and approved the final draft.

393

#### 394 **Funding**

395 This material is based on work supported by the National Science Foundation under grant  
396 number NSF IOS-1656756.

397

#### 398 **Acknowledgments**

399 We thank the Queller/Strassmann lab group for much useful advice. We particularly thank Jason  
400 Zuke for help with microscopy and Joe LaManna for help with principal component analysis in  
401 R. We are grateful to James Tiedje at Michigan State University for *Burkholderia xenovorans*  
402 LB400 and to Dr. Lionel Moulin at IPME, University of Montpellier, France for *Burkholderia*  
403 *phymatum* STM 815.

404

#### 405 **References**

406 1. McFall-Ngai M, Hadfield MG, Bosch TC, Carey HV, Domazet-Lošo T, Douglas AE,  
407 Dubilier N, Eberl G, Fukami T, Gilbert SF. 2013. Animals in a bacterial world, a new  
408 imperative for the life sciences. *Proceedings of the National Academy of Sciences*  
409 110:3229-3236.

- 410 2. Tosetti N, Croxatto A, Greub G. 2014. Amoebae as a tool to isolate new bacterial species,  
411 to discover new virulence factors and to study the host–pathogen interactions. *Microbial*  
412 *Pathogenesis* 77:125-130.
- 413 3. Hoffmann C, Harrison CF, Hilbi H. 2014. The natural alternative: protozoa as cellular  
414 models for *Legionella* infection. *Cellular Microbiology* 16:15-26.
- 415 4. DiSalvo S, Haselkorn TS, Bashir U, Jimenez D, Brock DA, Queller DC, Strassmann JE.  
416 2015. *Burkholderia* bacteria infectiously induce the proto-farming symbiosis of  
417 *Dictyostelium* amoebae and food bacteria. *Proceedings of the National Academy of*  
418 *Sciences of the United States of America* 112:E5029-E5037.
- 419 5. Yabuuchi E, Kosako Y, Oyaizu H, Yano I, Hotta H, Hashimoto Y, Ezaki T, Arakawa M.  
420 1992. Proposal of *Burkholderia* gen. nov. and transfer of seven species of the genus  
421 *Pseudomonas* homology group II to the new genus, with the type species *Burkholderia*  
422 *cepacia* (Palleroni and Holmes 1981) comb. nov. *Microbiology and Immunology*  
423 36:1251-1275.
- 424 6. Pegues DA. 2017. *Burkholderia cepacia* complex. *Infectious Disease and Antimicrobial*  
425 *Agents*.
- 426 7. Sawana A, Adeolu M, Gupta RS. 2014. Molecular signatures and phylogenomic analysis  
427 of the genus *Burkholderia*: proposal for division of this genus into the emended genus  
428 *Burkholderia* containing pathogenic organisms and a new genus *Paraburkholderia* gen.  
429 nov. harboring environmental species. *Frontiers in Genetics* 5.
- 430 8. Vandamme P, Peeters C, De Smet B, Price EP, Sarovich DS, Henry DA, Hird TJ, Zlosnik  
431 JEA, Mayo M, Warner J, Baker A, Currie BJ, Carlier A. 2017. Comparative Genomics of

- 432 Burkholderia singularis sp. nov., a Low G+C Content, Free-Living Bacterium That  
433 Defies Taxonomic Dissection of the Genus Burkholderia. *Frontiers in Microbiology* 8.  
434 9. Moran NA, McCutcheon JP, Nakabachi A. 2008. Genomics and evolution of heritable  
435 bacterial symbionts. *Annual Review of Genetics* 42:165-190.
- 436 10. Gregory TR. 2001. The bigger the C-value, the larger the cell: genome size and red blood  
437 cell size in vertebrates. *Blood Cells, Molecules, and Diseases* 27:830-843.
- 438 11. Organ CL, Shedlock AM, Meade A, Pagel M, Edwards SV. 2007. Origin of avian  
439 genome size and structure in non-avian dinosaurs. *Nature* 446:180-184.
- 440 12. Šímová I, Herben T. 2012. Geometrical constraints in the scaling relationships between  
441 genome size, cell size and cell cycle length in herbaceous plants. *Proceedings of the*  
442 *Royal Society of London B: Biological Sciences* 279:867-875.
- 443 13. Beaulieu JM, Leitch IJ, Patel S, Pendharkar A, Knight CA. 2008. Genome size is a strong  
444 predictor of cell size and stomatal density in angiosperms. *New Phytologist* 179:975-986.
- 445 14. Sussman M. 1956. On the relation between growth and morphogenesis in the slime mold  
446 *Dictyostelium discoideum*. *The Biological Bulletin* 110:91-95.
- 447 15. Brock DA, Douglas TE, Queller DC, Strassmann JE. 2011. Primitive agriculture in a  
448 social amoeba. *Nature* 469:393-396.
- 449 16. Zielezinski A, Vinga S, Almeida J, Karlowski WM. 2017. Alignment-free sequence  
450 comparison: benefits, applications, and tools. *Genome Biology* 18:186.
- 451 17. Janda JM, Abbott SL. 2007. 16S rRNA gene sequencing for bacterial identification in the  
452 diagnostic laboratory: pluses, perils, and pitfalls. *Journal of Clinical Microbiology*  
453 45:2761-2764.

- 454 18. Fan H, Ives AR, Surget-Groba Y, Cannon CH. 2015. An assembly and alignment-free  
455 method of phylogeny reconstruction from next-generation sequencing data. *BMC*  
456 *Genomics* 16:522.
- 457 19. R Core Team. 2014. *R: A language and environment for statistical computing*. R  
458 Foundation for Statistical Computing, Vienna, Austria.
- 459 20. Fox J, Weisberg S. 2011. *An R Companion to Applied Regression*. Sage.
- 460 21. Bates D, Mächler M, Bolker B, Walker S. 2014. Fitting Linear Mixed-Effects Models  
461 using lme4. arXivorg. 1406.5823):
- 462 22. Freeman GH, Halton JH. 1951. Note On An Exact Treatment Of Contingency, Goodness  
463 Of Fit And Other Problems Of Significance. *Biometrika* 38:141-149.
- 464 23. Benjamini Y, Hochberg Y. 1995. Controlling the false discovery rate: a practical and  
465 powerful approach to multiple testing. *Journal of the Royal Statistical Society Series B*  
466 (Methodological):289-300.
- 467 24. Douglas TE, Brock DA, Adu-Oppong B, Queller DC, Strassmann JE. 2013. Collection  
468 and cultivation of dictyostelids from the wild. *Methods in Molecular Biology:*  
469 *Dictyostelium discoideum Protocols, Second Edition*:113-124.

470

471 **Table**

472 **Table 1.**

473

| Characteristic                  | <i>B. fungorum</i><br>ATCC<br>BAA-463 | <i>B. xenovorans</i><br>LB400 | <i>B. phymatum</i><br>STM-815 | <i>B. agricolaris</i><br>sp. nov | <i>B. hayleyella</i><br>sp. nov | <i>B. bonniea</i><br>sp. nov |
|---------------------------------|---------------------------------------|-------------------------------|-------------------------------|----------------------------------|---------------------------------|------------------------------|
| n (# strains)                   | 1                                     | 1                             | 1                             | 7                                | 7                               | 2                            |
| <i>Dictyostelium</i>            | -                                     | -                             | -                             | +                                | +                               | +                            |
| Cell length (µm)                | 1.57 ± 0.03                           | 1.66 ± 0.03                   | 1.7 ± 0.03                    | 1.45 ± 0.009                     | 1.36 ± 0.009                    | 1.38 ± 0.014                 |
| Optimal growth temperature (°C) | 37                                    | 30 and 37                     | 37                            | 30                               | 30                              | 30                           |
| Maltose                         | -                                     | -                             | -                             | 43%                              | -                               | -                            |
| D-Cellobiose                    | -                                     | -                             | -                             | 71%                              | -                               | -                            |
| α-D-Lactose                     | -                                     | -                             | -                             | 71%                              | -                               | -                            |
| γ-Hydroxy Butyric               | -                                     | +                             | -                             | 57%                              | -                               | -                            |
| Inosine                         | -                                     | -                             | -                             | 86%                              | -                               | +                            |
| D-Melibiose                     | +                                     | -                             | -                             | -                                | -                               | -                            |
| Xylitol                         | +                                     | -                             | +                             | 57%                              | -                               | -                            |
| Glycyl-L-Aspartic               | +                                     | +                             | -                             | 71%                              | -                               | -                            |
| Gentiobiose                     | +                                     | +                             | -                             | 57%                              | -                               | 50%                          |
| Glucuronamide                   | +                                     | +                             | +                             | 57%                              | -                               | -                            |
| α-Keto Valeric Acid             | +                                     | +                             | +                             | 71%                              | -                               | -                            |
| 2-Aminoethanol                  | +                                     | +                             | +                             | 71%                              | -                               | -                            |
| D-Galacturonic Acid             | +                                     | +                             | +                             | 86%                              | -                               | -                            |
| L-Fucose                        | +                                     | +                             | +                             | +                                | 29%                             | -                            |
| D-Galactose                     | +                                     | +                             | +                             | +                                | -                               | 50%                          |
| Mono-Methyl-                    | +                                     | +                             | +                             | +                                | -                               | 50%                          |
| N-Acetyl-D-                     | +                                     | +                             | +                             | +                                | -                               | -                            |
| L-Arabinose                     | +                                     | +                             | +                             | +                                | -                               | -                            |
| D-Arabitol                      | +                                     | +                             | +                             | +                                | -                               | -                            |
| m-Inositol                      | +                                     | +                             | +                             | +                                | -                               | -                            |
| D-Mannitol                      | +                                     | +                             | +                             | +                                | -                               | -                            |
| L-Rhamnose                      | +                                     | +                             | +                             | +                                | -                               | -                            |
| D-Sorbitol                      | +                                     | +                             | +                             | +                                | -                               | -                            |
| Formic Acid                     | +                                     | +                             | +                             | +                                | -                               | -                            |
| D-Galactonic Acid               | +                                     | +                             | +                             | +                                | -                               | -                            |
| D-Glucuronic Acid               | +                                     | +                             | +                             | +                                | -                               | -                            |
| Malonic Acid                    | +                                     | +                             | +                             | +                                | -                               | -                            |
| Quinic Acid                     | +                                     | +                             | +                             | +                                | -                               | -                            |
| D-Saccharic Acid                | +                                     | +                             | +                             | +                                | -                               | -                            |
| Sebacic Acid                    | +                                     | +                             | +                             | +                                | -                               | -                            |

|                     |   |   |   |   |   |   |
|---------------------|---|---|---|---|---|---|
| L-Phenylalanine     | + | + | + | + | - | - |
| L-Pyroglutamic Acid | + | + | + | + | - | - |

474

475 **Table 1.** Summary table of comparisons for all species, including a subset of carbon usage types.

476 Included in this table are the number of *Burkholderia* sp. nov. isolates in each group, whether or

477 not the isolate is associated with *D. discoideum*, average bacterial length, and optimal growth

478 temperature. Next, a subset of about one-third of the relevant carbon types follows. A plus

479 symbol indicates all isolates were able to use a specific carbon and a minus symbol indicates the

480 opposite. A number value indicates the percentage of isolates in a specific group that can utilize

481 that particular carbon. *B. agricolaris* and *B. bonniea* are able to utilize some carbons that their

482 close *Burkholderia* relatives cannot.

483

484 **Figures**



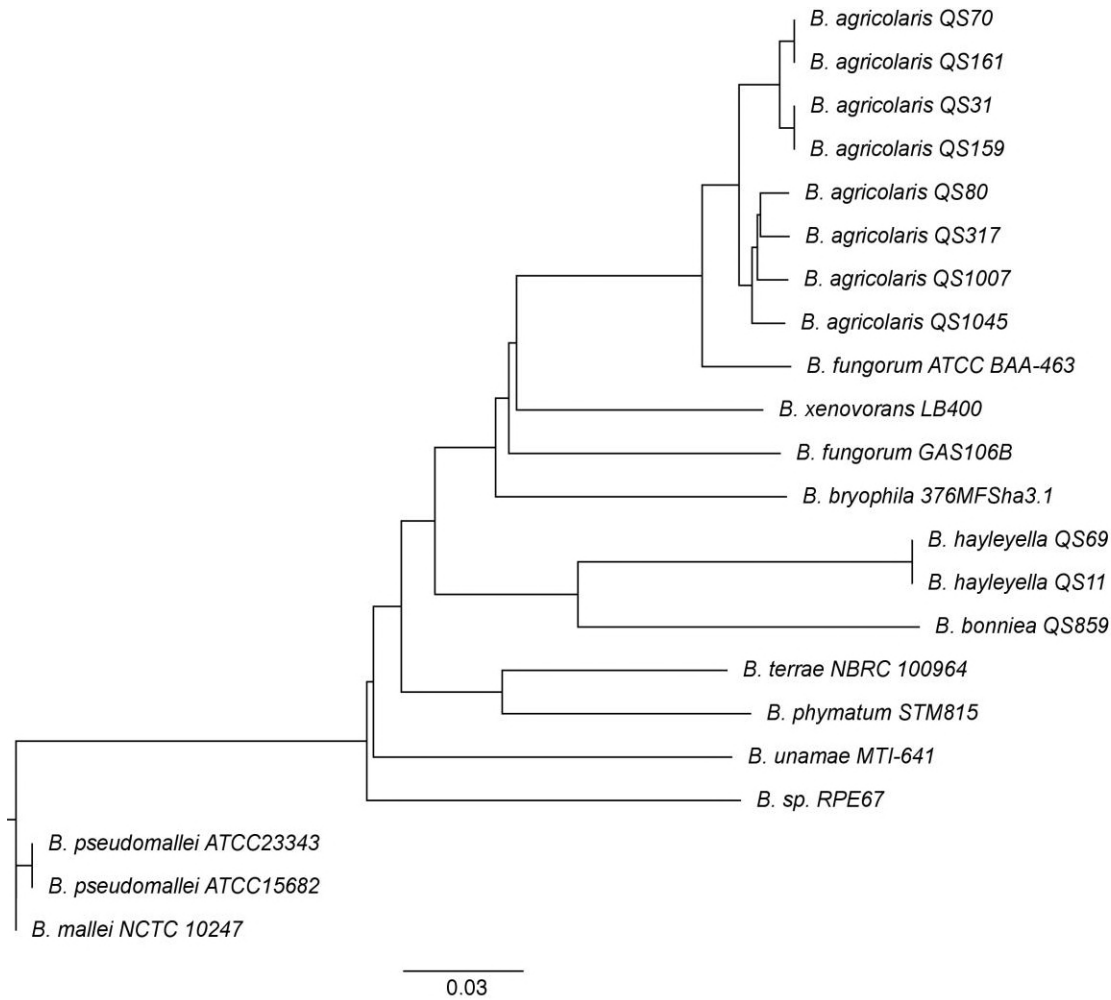

485

486

487 **Figure 1.** Phylogeny of three new non-pathogenic *Burkholderia* species found in association

488 with *D. discoideum*. We estimated the phylogenetic relationships of these symbionts with 11

489 known plant-associated and environmental *Burkholderia* species. We used k-mers frequencies

490 (k=23) of each genome and created an alignment and assembly-free distance tree. We ran 999

491 nonparametric bootstraps by resampling 1/k of the rows of the shared k-mer table and found that

492 each branching event was fully supported (bootstrap value = 1). The final tree is shown here

493 rooted by the *B. mallei* and *B. pseudomallei* clade part of the pathogenic *Burkholderia* cluster.

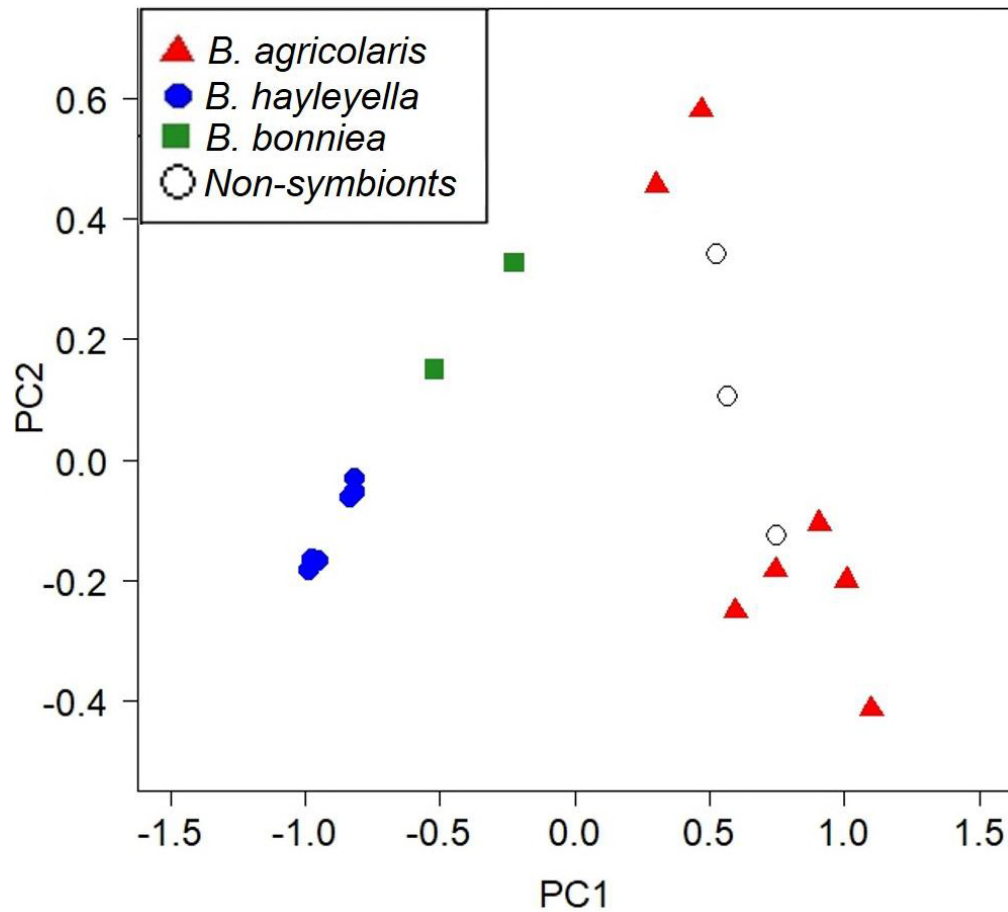

494

495 **Figure 2.** Principal component analysis plot of carbon usage. Principal Component 1 (x-axis)  
496 accounts for 79.3% of the variance and Principal Component 2 (y-axis) accounts for 8.6% of the  
497 variance. Each symbol represents one bacteria isolate with different symbols representing each  
498 species. A higher value on the x-axis represents a larger number of carbon sources that can be  
499 utilized; *B. hayleyella* and *B. bonniea* have greatly reduced carbon usage compared to *B.*  
500 *agricolaris* and the non-symbionts.

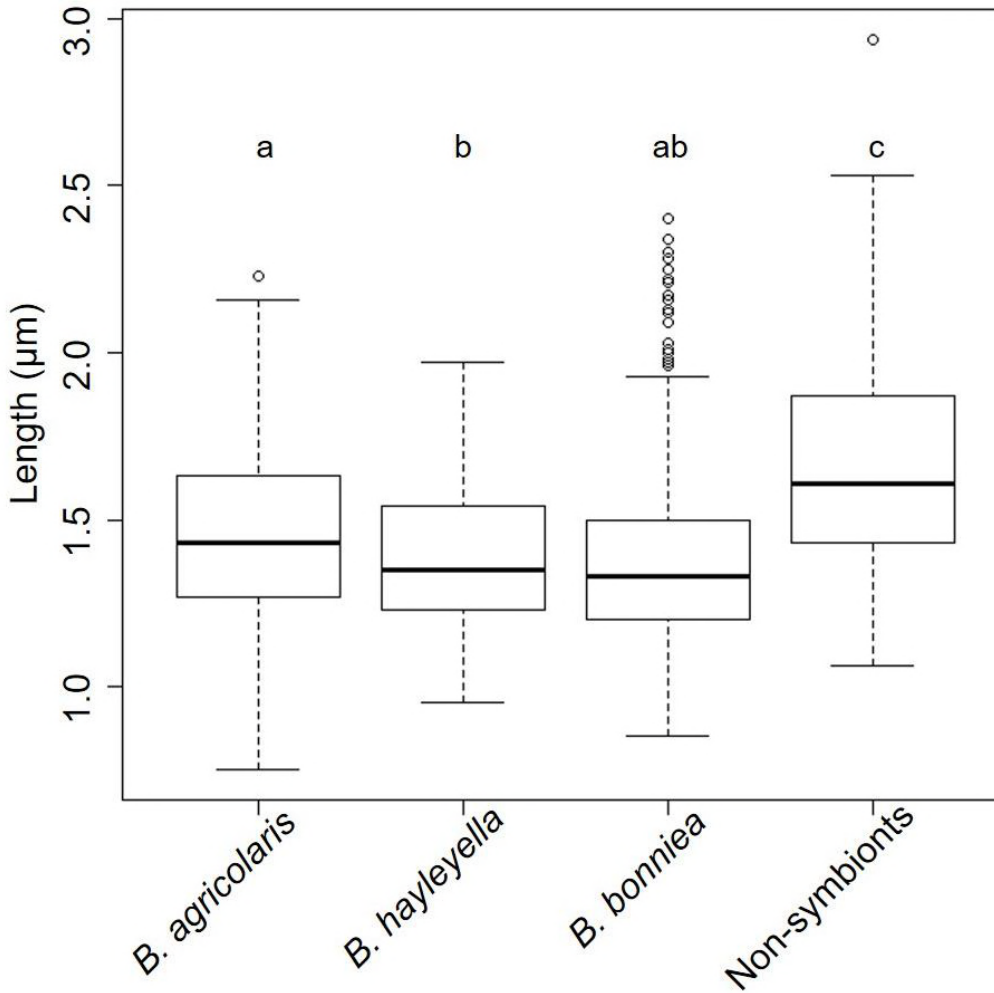

501

502

503 **Figure 3.** Symbiont *Burkholderia* bacteria lengths are shorter than non-symbionts. We measured  
504 the length of about one hundred bacteria for each *Burkholderia* sp. nov. and for the non-  
505 symbionts (see Supplementary table x). We used seven strains for *B. agricolaris*, seven strains  
506 for *B. hayleyella*, two strains for *B. bonniea*, and three strains for non-symbionts. We found all  
507 three symbiont bacteria species are shorter than non-symbiont bacteria species. Significant  
508 differences in length found between bacteria are indicated by different letters which reflect  
509 results of a Benjamini-Hochberg correction for multiple comparisons.

510

| Non-symbionts<br>(n=3) | <i>B. agricolaris</i><br>(n=7) | <i>B. hayleyella</i><br>(n=7) | <i>B. bonniea</i><br>(n=2) | Legend           |
|------------------------|--------------------------------|-------------------------------|----------------------------|------------------|
| 4                      | 4                              | 4                             | 4                          | No Growth        |
| 22                     | 22                             | 22                            | 22                         | Little Growth    |
| 30                     | 30                             | 30                            | 30                         | Moderate Growth  |
| 37                     | 37                             | 37                            | 37                         | Excellent Growth |
| 45                     | 45                             | 45                            | 45                         |                  |

511 **Figure 4.** The optimal growth temperature of *Burkholderia* sp. nov. is 30°C. We tested a range  
512 of temperatures to determine growth range and optimal temperature. *B. hayleyella* and *B.*  
513 *bonniea* have reduced range of growth and grow less densely compared to *B. agricolaris* and the  
514 non-symbionts. *B. agricolaris* has the same range as the three non-symbiont *Burkholderia* but  
515 grows less densely at 37°C and best at 30°C.
